# Supplementary material for: A Mendelian randomization analysis identifies causal association between sarcopenia and gastroesophageal reflux disease
Source: Aging (Albany NY). 2024 Mar 5;16(5):4723–35. doi: 10.18632/aging.205627 (PMC10968686; doi:10.18632/aging.205627)
Supplement: Supplementary Table 2 [file aging-16-205627-s002.xlsx]

## Sheet: Table S2
Supplementary Table 2. Single nucleotide polymorphisms used as instrumental variables Mendelian randomization analyses.
Exposure	Outcome	Sample size	SNP	b	SE	P	F-statistics
Low hand grip strength (EWGSOP)	Gastroesophageal reflux disease	602604	rs10952289	0.0253885	0.117076	0.828321	219.141
			rs12140813	0.0350521	0.119056	0.768439	202.653
			rs13107325	0.781988	0.102376	2.19946e-14	282.826
			rs143384	0.305963	0.0900789	0.00068225	368.821
			rs2899611	-0.161238	0.111866	0.149484	238.457
			rs3118903	0.367327	0.101618	0.000300596	289.974
			rs34464763	0.0201377	0.0911395	0.825128	363.119
			rs62102286	0.137829	0.0993419	0.165315	299.544
			rs7624084	0.278379	0.113242	0.013961	232.034
			rs958685	0.212917	0.112376	0.0581336	234.978
Usual walking pace	Gastroesophageal reflux disease	602604	rs10750025	-2.99155	0.619713	1.38386e-06	13.9329
			rs10828258	-3.17232	0.55427	1.04396e-08	17.3908
			rs10862220	-0.291435	0.612641	0.634286	14.2669
			rs10883618	0.672587	0.636612	0.290735	13.1122
			rs11077815	-1.18696	0.696593	0.0883913	10.9859
			rs11150623	-0.930942	0.520313	0.0735831	19.7729
			rs113825410	-2.3123	0.653253	0.000400622	12.4305
			rs11682482	-3.11936	0.643516	1.25107e-06	12.8539
			rs11732213	0.0358368	0.670241	0.957359	12.1476
			rs11761141	-1.5671	0.653574	0.0164966	12.6058
			rs11848096	-0.653658	0.659758	0.321806	12.298
			rs12042959	-2.34731	0.544895	1.64874e-05	17.8915
			rs12461902	-1.46872	0.641724	0.0220964	13.0453
			rs12747822	-1.06858	0.714267	0.134639	11.2528
			rs12883788	-1.7484	0.617376	0.004626	13.8988
			rs13107325	-2.8934	0.378796	2.19946e-14	37.4519
			rs139398785	-2.85836	0.691078	3.53267e-05	11.0916
			rs2037735	-0.0328053	0.655097	0.960061	12.3882
			rs205262	-3.99721	0.622794	1.379e-10	13.7184
			rs2170670	-1.49386	0.696489	0.0319657	11.0239
			rs2280406	-4.63064	0.483671	1.0289e-21	22.8163
			rs2439823	-2.59484	0.664367	9.39384e-05	12.0827
			rs2602731	-0.0864398	0.677387	0.89846	11.7445
			rs2644135	-3.33004	0.668588	6.33526e-07	11.7144
			rs2645979	-2.75396	0.581854	2.21139e-06	15.6863
			rs273512	-1.84167	0.507564	0.000285121	20.7123
			rs28519617	-1.91354	0.66476	0.00399515	11.9763
			rs35711462	-2.87545	0.673576	1.9641e-05	11.8027
			rs4109292	-1.58862	0.656765	0.0155694	12.4327
			rs4516268	-1.71737	0.619506	0.00556849	13.8824
			rs4643373	-3.38933	0.680356	6.30281e-07	11.5316
			rs4715208	-2.56466	0.666792	0.000119934	12.0314
			rs4839898	-1.92575	0.594277	0.00119322	15.3253
			rs57800857	-4.3862	0.574284	2.2116e-14	16.0458
			rs613872	-2.19063	0.431573	3.85606e-07	28.6201
			rs62048402	-3.3607	0.492374	8.76164e-12	21.5931
			rs6763292	-0.847449	0.606121	0.162068	14.4673
			rs7789719	-0.925453	0.682672	0.175216	11.4371
			rs7795394	-1.59285	0.533027	0.00280517	18.6671
			rs7896518	-1.96131	0.482361	4.78112e-05	22.4776
			rs8010773	-2.19825	0.605361	0.000281991	14.4873
			rs8011870	-0.295498	0.681843	0.664737	11.5625
			rs819167	-2.30836	0.634421	0.000274203	13.6613
			rs830627	-2.72161	0.658647	3.59439e-05	12.3178
			rs891387	-3.02298	0.612417	7.96791e-07	14.2066
			rs9783304	-3.01872	0.682186	9.64108e-06	11.4895
Appendicular lean mass	Gastroesophageal reflux disease	602604	rs10005035	-0.463341	0.305599	0.129476	55.8803
			rs10019221	-1.04821	0.399763	0.00873953	33.3035
			rs1005723	-0.726224	0.372084	0.0509654	36.0409
			rs10068640	-0.424429	0.451161	0.346833	26.1851
			rs10075249	-0.43257	0.336994	0.199277	46.0354
			rs10107388	-0.310232	0.309143	0.315608	53.0182
			rs10112506	0.172305	0.410448	0.674633	30.8448
			rs10123619	-0.152704	0.370282	0.680048	34.9423
			rs10171272	0.672274	0.383849	0.0798771	35.21
			rs10202701	-0.317587	0.213086	0.136114	115.217
			rs10202845	0.102085	0.248048	0.680666	75.048
			rs10203320	0.620363	0.372255	0.0956139	37.8548
			rs10205141	-0.141567	0.4719	0.764183	23.7115
			rs10221831	-0.95097	0.46117	0.0392	25.1813
			rs10225945	0.42735	0.465627	0.358727	24.4611
			rs10242866	-0.53608	0.313492	0.0872603	53.2005
			rs10283100	0.0996334	0.183197	0.586537	156.119
			rs1035583	0.143447	0.334318	0.66787	46.5828
			rs10471339	-1.69838	0.452447	0.000174197	25.7316
			rs1047891	0.734425	0.222221	0.000950002	105.672
			rs10483727	-0.257809	0.134159	0.0546478	290.056
			rs1056747	-0.0622824	0.316264	0.843881	52.4045
			rs1063582	0.0394536	0.30654	0.89759	55.428
			rs10748128	0.157108	0.198368	0.428359	132.283
			rs10776560	0.322827	0.307073	0.293119	55.4967
			rs10796828	0.184291	0.324836	0.570487	49.5144
			rs10807137	0.0739545	0.1439	0.607302	269.308
			rs10815274	0.3126	0.389609	0.422355	34.3515
			rs10822117	0.526026	0.322993	0.103397	50.4454
			rs10829226	0.526239	0.447005	0.239094	26.1545
			rs10832963	0.00191216	0.27224	0.994396	70.5977
			rs10845408	-0.631576	0.197412	0.00137769	133.909
			rs10858246	0.103138	0.274676	0.707297	69.0697
			rs10922475	0.0163195	0.303821	0.957163	56.5646
			rs10948	0.161939	0.202316	0.423464	127.654
			rs10962212	-1.18375	0.343849	0.000576065	44.8132
			rs11009928	-0.421545	0.370964	0.25581	37.4451
			rs11014285	0.191411	0.190938	0.316111	145.439
			rs11042717	-0.068019	0.166013	0.682011	189.324
			rs11049704	-0.37578	0.279751	0.179185	62.4776
			rs11060942	-0.0366881	0.371444	0.921319	37.4864
			rs11068230	0.0647475	0.2958	0.826736	59.3475
			rs11098677	0.172728	0.21055	0.412008	104.255
			rs111622870	-0.168829	0.416188	0.684996	32.8547
			rs11175919	0.66635	0.434229	0.124893	27.9849
			rs111901094	-0.870889	0.285902	0.00231822	85.8269
			rs11198591	-0.0266283	0.337718	0.937154	45.8991
			rs11210892	-1.47058	0.434924	0.000721626	27.5295
			rs112153300	-0.606379	0.325164	0.0622036	49.7408
			rs11243202	-0.2052	0.159736	0.198925	205.251
			rs112537273	0.141829	0.263713	0.590705	71.6642
			rs11260035	0.318339	0.363262	0.380849	40.4987
			rs11260623	0.184712	0.41125	0.653325	30.8099
			rs113232639	0.0184877	0.14711	0.899991	240.801
			rs113671109	0.373726	0.385053	0.331755	34.7703
			rs113898003	0.0984778	0.151917	0.516833	226.596
			rs115010283	0.131452	0.151741	0.386328	225.186
			rs115105539	0.169715	0.286889	0.554138	66.7575
			rs11590254	0.304861	0.28083	0.277667	66.8115
			rs116052377	0.172584	0.384672	0.653682	33.8988
			rs11605297	-0.150766	0.391226	0.699964	34.2851
			rs11633371	-0.151828	0.222921	0.495817	104.823
			rs116339650	0.222038	0.373386	0.55207	30.5773
			rs11672848	-0.155606	0.281873	0.580919	65.6777
			rs1168768	-0.808831	0.461548	0.0796997	24.1946
			rs11727162	0.219336	0.283278	0.438765	65.0688
			rs11778491	0.179388	0.224196	0.423629	103.524
			rs1190540	-0.43032	0.419758	0.305286	29.6443
			rs11959466	-0.0834676	0.279103	0.764896	69.2111
			rs1202186	-0.141907	0.421063	0.736102	29.312
			rs12074850	0.0953807	0.214952	0.657237	113.706
			rs12099669	0.165552	0.158258	0.295521	208.763
			rs12188208	0.45211	0.290132	0.119165	61.5467
			rs12230946	0.731188	0.309593	0.0181878	54.7647
			rs12340775	0.685087	0.372077	0.0655846	38.6861
			rs12344515	0.117009	0.341763	0.732073	43.6681
			rs12347137	-0.0934424	0.130606	0.474331	307.697
			rs12351226	-0.208371	0.31688	0.510815	60.7296
			rs12461874	-0.0514261	0.297467	0.862746	59.2728
			rs12483401	-0.518426	0.43439	0.23269	28.5033
			rs12512942	-0.118218	0.32188	0.713415	54.6128
			rs12517711	-0.716524	0.335628	0.0327712	46.3688
			rs12519407	0.247971	0.304839	0.41596	56.2959
			rs12533452	0.108947	0.280514	0.697732	66.9173
			rs12541381	0.152275	0.172356	0.37697	175.267
			rs12563442	-0.167841	0.457711	0.713846	26.226
			rs1260326	-0.117947	0.152375	0.438897	224.719
			rs12616192	-0.0758697	0.379579	0.841576	38.6672
			rs12655296	-0.525684	0.451666	0.244474	25.5358
			rs12672217	-0.640279	0.360712	0.0758905	40.1328
			rs12702693	-0.315837	0.279129	0.257842	66.8209
			rs12724708	0.0661453	0.206409	0.748621	122.152
			rs12773500	-0.945333	0.41216	0.0218129	31.2291
			rs12831751	-0.835453	0.310999	0.00722372	54.372
			rs12882130	-0.527668	0.246638	0.0323998	86.8966
			rs12907139	-0.711315	0.323297	0.0277931	49.8645
			rs1290786	-0.765497	0.339541	0.0241646	45.1551
			rs12909863	-0.55563	0.294972	0.0596102	60.5121
			rs1291114	0.73911	0.449188	0.0998804	26.323
			rs12926103	-0.113646	0.355037	0.748895	41.1296
			rs12962050	-2.27012	0.328942	5.15311e-12	48.3022
			rs12997625	-0.609853	0.28381	0.0316497	64.885
			rs13037813	-0.387565	0.192661	0.0442576	139.728
			rs13103161	-0.205055	0.173709	0.23782	172.707
			rs13123591	0.445706	0.274219	0.104084	68.9199
			rs13170063	-0.566139	0.32365	0.080251	50.2527
			rs13209685	-0.447144	0.227647	0.0495067	92.598
			rs1324538	-0.0728641	0.20725	0.725157	119.627
			rs1325596	0.00776979	0.168334	0.963185	183.824
			rs1330826	0.454273	0.357177	0.203429	41.4457
			rs13391980	-0.468916	0.329648	0.154888	48.0756
			rs1340022	-0.243387	0.408291	0.5511	31.3261
			rs1405227	0.37326	0.403223	0.354607	32.4299
			rs143384	-0.23	0.0677145	0.00068225	1142.38
			rs1443536	0.0144701	0.24015	0.951953	90.7319
			rs1444628	-0.0725192	0.217465	0.738775	110.894
			rs1472852	-0.457997	0.103878	1.03859e-05	488.656
			rs1478575	0.116253	0.166121	0.484046	189.447
			rs14976	-0.361944	0.362104	0.317525	39.6352
			rs1514134	-0.166991	0.433344	0.699974	27.708
			rs1556659	-0.316335	0.30505	0.299738	56.4767
			rs1584011	0.00739597	0.316296	0.981345	52.1916
			rs165849	0.472492	0.34229	0.167469	46.837
			rs17197114	0.0891096	0.357134	0.802964	41.1357
			rs17205463	-0.410981	0.183967	0.0254832	154.063
			rs17246129	-0.24231	0.206725	0.241143	123.045
			rs17278379	0.397855	0.323042	0.218102	49.965
			rs1730028	0.254958	0.372632	0.493844	37.5817
			rs173135	0.462226	0.221863	0.0372165	106.593
			rs17400325	-0.490229	0.351328	0.162907	42.6378
			rs17478946	0.0687146	0.272958	0.801242	69.7741
			rs17681189	0.207122	0.372521	0.57821	37.7222
			rs17718736	-1.69524	0.448728	0.000158164	26.0259
			rs17773965	-0.825442	0.423452	0.0512575	29.0138
			rs17818592	-0.575983	0.375269	0.12482	36.8649
			rs1786263	-0.754984	0.258559	0.00350066	77.6637
			rs1797070	-0.122133	0.248758	0.623447	84.8206
			rs1823217	-1.21133	0.278213	1.3369e-05	67.5679
			rs188617336	-0.636375	0.37113	0.0864012	35.8982
			rs1899040	-0.327981	0.400136	0.412402	33.7615
			rs1933081	-0.777562	0.328455	0.017917	49.0784
			rs199647708	0.340512	0.430234	0.428677	28.0145
			rs200439	-0.108422	0.458616	0.813114	25.3762
			rs2005172	-0.0601092	0.104963	0.566867	478.696
			rs2019203	0.0912196	0.254681	0.720215	80.403
			rs2025609	-0.369491	0.362785	0.308447	39.4834
			rs2025808	-0.0208759	0.452435	0.963198	25.4041
			rs2035901	-0.463667	0.20108	0.021117	129.172
			rs2101017	0.0126675	0.326052	0.969009	50.8176
			rs2112617	-1.42485	0.28844	7.81794e-07	62.5755
			rs212526	-0.425394	0.22942	0.0637086	98.9361
			rs2138374	-0.547623	0.351162	0.118888	42.303
			rs2140619	-1.58334	0.43565	0.0002786	27.8731
			rs2142331	-0.158281	0.298209	0.595576	58.7311
			rs2181834	0.0979961	0.19026	0.606508	143.815
			rs2209098	-0.478729	0.216232	0.0268315	111.13
			rs2212926	0.196306	0.269445	0.466271	72.4679
			rs2229840	-0.527718	0.192685	0.00616718	140.559
			rs2230033	-0.201413	0.183017	0.271106	155.522
			rs2236096	-0.0279235	0.314745	0.929306	52.0993
			rs2237485	-0.604995	0.303532	0.0462418	57.0003
			rs2240735	0.171027	0.293384	0.559929	60.64
			rs2268718	0.392839	0.383632	0.305835	35.3215
			rs2274351	-0.216753	0.283631	0.444743	64.5812
			rs2283200	0.285804	0.378491	0.450181	37.5278
			rs2287821	-0.46834	0.314667	0.136655	52.6872
			rs2289629	-1.02679	0.34137	0.00263103	44.5822
			rs2296316	-0.368957	0.25218	0.143448	82.5805
			rs2303423	0.537961	0.461592	0.243838	24.7837
			rs2305141	-0.770137	0.268283	0.00409678	72.6173
			rs2324154	-0.101571	0.321291	0.751901	50.6391
			rs2347603	-0.336965	0.305851	0.27058	56.5106
			rs2347808	-0.83672	0.386582	0.0304335	35.1506
			rs2390669	0.0680684	0.413103	0.869122	30.6143
			rs2454390	-0.870665	0.374849	0.0201948	36.3628
			rs246177	-0.0810098	0.234004	0.7292	95.9421
			rs2490302	-0.414001	0.389362	0.287655	34.6823
			rs249677	-0.887309	0.458519	0.0529704	24.8469
			rs2521349	0.0241168	0.319885	0.939903	51.215
			rs2529090	-1.09705	0.459261	0.0169066	24.691
			rs2545339	0.503939	0.435372	0.247072	27.7983
			rs2578565	-0.356108	0.360093	0.322696	40.3189
			rs258794	-0.255684	0.368017	0.487205	38.921
			rs2592208	-0.870734	0.388261	0.0249194	34.5938
			rs261223	-0.375115	0.284781	0.18777	64.3061
			rs2648725	-0.724376	0.355256	0.0414474	41.1558
			rs2663126	0.11895	0.371914	0.749097	37.1847
			rs2717008	-0.269083	0.390389	0.490653	34.3411
			rs2748501	-0.691872	0.249055	0.00546974	84.3646
			rs2754255	-0.968281	0.37649	0.0101152	36.7021
			rs2763263	-0.00900271	0.339421	0.97884	48.0765
			rs2764264	0.107176	0.258193	0.678068	78.6154
			rs2788213	0.246991	0.432928	0.56833	28.0294
			rs2789365	0.417845	0.331682	0.20775	47.266
			rs2791654	0.440335	0.230693	0.0562945	106.746
			rs2807339	-0.870037	0.348018	0.0124201	43.281
			rs28529055	-0.317865	0.331108	0.337053	47.8742
			rs28678024	1.03191	0.456128	0.0236775	26.0082
			rs2871865	-0.220385	0.152946	0.149604	224.373
			rs2871960	-0.211404	0.103087	0.0402922	489.674
			rs28736838	-0.398961	0.445317	0.370305	25.971
			rs291979	-0.465008	0.236364	0.0491437	93.1005
			rs2923411	-1.1188	0.385694	0.00372295	35.0126
			rs2925155	-0.110212	0.366763	0.763797	39.1017
			rs293517	-0.432755	0.404	0.284091	31.8932
			rs2971857	0.273147	0.41523	0.510653	31.1604
			rs2978362	-0.595953	0.455481	0.190737	25.1884
			rs301807	0.843924	0.339417	0.0129047	45.4453
			rs3103223	0.516029	0.437179	0.237856	27.5279
			rs310796	0.41404	0.363659	0.254895	39.4417
			rs3116194	0.111483	0.275826	0.686082	69.1556
			rs3116602	-0.348534	0.095474	0.000261662	570.526
			rs3184504	-0.888765	0.262856	0.000721728	75.316
			rs331917	-0.484765	0.384714	0.207646	35.376
			rs332116	-0.0546422	0.261422	0.834433	77.1175
			rs336630	0.480358	0.460134	0.296508	24.8001
			rs34338597	0.163844	0.439727	0.709444	26.6997
			rs34390533	-0.319581	0.219296	0.145032	110.948
			rs34522021	-1.30083	0.387733	0.000793797	35.4496
			rs34776209	-0.43788	0.180153	0.015074	168.592
			rs34879158	0.0141526	0.150626	0.925142	230.109
			rs35073631	-0.56557	0.433856	0.192374	27.7353
			rs350832	-1.08194	0.349447	0.00196051	43.302
			rs35288270	-0.27013	0.229389	0.238953	112.732
			rs35732917	0.385282	0.261514	0.140677	76.2635
			rs36048468	-0.302913	0.227037	0.182138	95.9957
			rs3764002	-0.881204	0.195279	6.40565e-06	136.446
			rs3768495	-0.577326	0.299654	0.0540243	57.8625
			rs3769598	-0.00944743	0.401981	0.98125	32.4215
			rs377599	0.0969258	0.224537	0.665982	100.225
			rs3778858	0.0146127	0.463456	0.974847	24.4789
			rs3818416	-0.0689172	0.203919	0.735391	126.233
			rs3822742	0.209896	0.30838	0.496099	55.1303
			rs3828729	-0.804512	0.324787	0.0132474	49.2617
			rs395980	0.799087	0.297114	0.00715592	59.1727
			rs40270	-0.0558718	0.365364	0.878461	36.0976
			rs4073154	-0.266905	0.212137	0.208329	116.644
			rs4076108	-0.00954759	0.321692	0.976323	50.4215
			rs4077103	0.180892	0.46431	0.696837	24.4229
			rs42039	-0.121284	0.116593	0.298233	385.061
			rs4282339	-0.102234	0.190663	0.591818	143.269
			rs4287835	-0.684116	0.327945	0.0369724	48.4266
			rs4602848	-0.591019	0.322347	0.0667302	50.0675
			rs4622329	-0.284958	0.340216	0.402267	45.4615
			rs4640244	-0.486987	0.246215	0.0479407	86.4122
			rs4644481	-0.569565	0.437183	0.192641	27.7307
			rs4655345	0.0722089	0.199963	0.718016	130.535
			rs4682483	-0.350353	0.388085	0.366646	31.8403
			rs4683435	-0.34455	0.39759	0.386164	32.8383
			rs4735761	0.234257	0.161271	0.146345	201.426
			rs4748008	-0.339142	0.392521	0.387583	34.5759
			rs4752689	0.171047	0.238362	0.473008	91.9618
			rs4752829	-0.0327631	0.203187	0.871899	126.286
			rs4788218	0.173433	0.178444	0.331091	163.632
			rs4807472	0.375272	0.327108	0.251281	49.2095
			rs4818280	0.220828	0.404568	0.585178	32.3872
			rs4847378	-0.258406	0.363579	0.477253	39.5488
			rs4852257	-0.424997	0.211479	0.0444696	117.36
			rs4865956	-0.452566	0.203181	0.0259204	126.741
			rs4870941	0.0327024	0.191504	0.864408	144.098
			rs488621	-0.355524	0.251889	0.158117	81.8213
			rs4900578	-0.601395	0.281441	0.0326105	65.6815
			rs4932439	0.459252	0.420157	0.274372	29.5914
			rs4938359	-1.19192	0.383213	0.00186884	35.3797
			rs4940874	-0.292895	0.415824	0.481202	30.1244
			rs4965298	0.594506	0.450815	0.187258	26.1118
			rs496783	0.178784	0.390792	0.647318	34.4456
			rs4985445	-0.853669	0.275951	0.00197775	68.4317
			rs55872725	1.48505	0.221804	2.15227e-11	106.858
			rs568267	0.0243399	0.450763	0.956937	25.5877
			rs57059662	-0.419004	0.437953	0.338701	27.4015
			rs5742915	-0.276149	0.194575	0.155827	137.636
			rs5753518	0.0975174	0.34913	0.780003	43.1515
			rs5763821	-0.552455	0.253412	0.0292524	78.2153
			rs577289	0.355531	0.433064	0.411665	28.4164
			rs57791149	-0.279442	0.283728	0.324677	64.8184
			rs591668	-0.458746	0.28259	0.104512	65.2182
			rs599004	0.306548	0.356881	0.39036	44.8198
			rs59985551	0.0366476	0.181465	0.839953	154.418
			rs6028716	0.12503	0.261894	0.633073	76.1689
			rs604723	0.143761	0.32531	0.658546	49.5
			rs6054390	-0.262409	0.264549	0.321242	74.3644
			rs6066122	-0.0773127	0.448662	0.863187	26.2576
			rs60804050	0.269951	0.258316	0.296004	80.7558
			rs6082354	0.331667	0.214072	0.121303	115.147
			rs610694	-1.13444	0.35344	0.00132869	41.6265
			rs61397287	0.744523	0.388451	0.0552826	34.3753
			rs6142059	1.38019	0.415178	0.000886316	30.2876
			rs61528919	1.08403	0.355178	0.00227267	40.7123
			rs62033029	-0.506787	0.421816	0.22958	29.326
			rs62070319	-0.862333	0.271646	0.00150105	71.9926
			rs62515437	0.0274531	0.155644	0.859992	214.106
			rs6425817	1.16646	0.326514	0.000353642	48.8982
			rs6470771	-0.134559	0.238617	0.572815	91.0202
			rs6502935	-0.532151	0.439858	0.226346	27.2002
			rs650508	-0.45466	0.403078	0.259332	32.009
			rs6543146	-0.16898	0.316055	0.592889	52.6798
			rs6570509	-0.865406	0.218504	7.4764e-05	109.686
			rs6593210	-0.595845	0.409945	0.146092	31.634
			rs664317	0.555428	0.369103	0.132374	38.397
			rs6675858	0.357864	0.428891	0.404059	28.4399
			rs6693481	0.392438	0.36616	0.283825	39.0292
			rs670318	-0.369295	0.269412	0.170454	70.8915
			rs6738207	0.260584	0.387364	0.501131	34.8803
			rs6739278	-0.762129	0.289891	0.00856329	61.6394
			rs67527161	-0.0127482	0.325625	0.968771	49.316
			rs6762851	-0.614362	0.224141	0.00612599	98.2934
			rs67716382	-0.240204	0.26336	0.361729	79.2977
			rs6789000	-0.0899851	0.417428	0.829323	30.1938
			rs680882	-0.465905	0.424917	0.272876	29.0059
			rs684905	0.234343	0.412482	0.569947	30.4965
			rs6849302	-0.608133	0.390322	0.119226	34.3174
			rs6860245	0.234041	0.0947764	0.013534	583.361
			rs6902109	0.637126	0.288817	0.027385	62.3887
			rs6931421	-0.141379	0.184653	0.443886	153.179
			rs700677	0.738855	0.291691	0.0113088	61.3612
			rs7014590	0.285427	0.230372	0.215352	90.3955
			rs7020491	-0.880815	0.274026	0.00130744	69.8009
			rs702886	-0.153863	0.413208	0.709624	29.5211
			rs704660	0.521075	0.320044	0.103496	50.9778
			rs7082659	-0.448302	0.438008	0.30607	25.3833
			rs713467	0.205798	0.332222	0.535614	47.1681
			rs71414738	0.445197	0.435441	0.306589	29.4244
			rs7144307	-1.55599	0.408829	0.000141247	31.7459
			rs7185244	0.707358	0.393193	0.0720173	34.2988
			rs718603	-0.307013	0.411498	0.455615	30.9779
			rs7220127	0.493192	0.46485	0.288704	24.2831
			rs7229520	-0.520902	0.22659	0.021512	101.18
			rs723149	-0.215788	0.176054	0.220313	168.846
			rs72657800	-0.401765	0.413711	0.331486	30.8058
			rs72695791	-0.305387	0.434498	0.482149	27.5673
			rs72801843	-0.618719	0.16609	0.00019516	185.865
			rs72809820	0.0492108	0.462024	0.915177	24.3017
			rs73006226	0.551654	0.37554	0.141843	33.0058
			rs7301341	-0.498557	0.20683	0.0159322	128.856
			rs73052033	-1.08206	0.410972	0.00846516	30.972
			rs7320878	-0.541456	0.332008	0.102921	48.4911
			rs7328187	0.385984	0.41568	0.353118	30.2936
			rs73384223	0.115378	0.301132	0.70161	59.8029
			rs7367519	0.253368	0.324949	0.435557	52.3012
			rs73856768	0.281582	0.36392	0.43908	40.6683
			rs7418410	-0.242297	0.316234	0.443559	52.2958
			rs74379684	0.441401	0.335394	0.188152	46.2799
			rs74494415	0.284432	0.284988	0.318256	59.848
			rs7485647	0.353631	0.254087	0.163991	80.7795
			rs7522400	0.2495	0.443029	0.573321	26.677
			rs7543202	-1.44624	0.385995	0.000179112	35.2017
			rs757834	-0.309208	0.236175	0.190456	89.2189
			rs7598430	-0.30683	0.300481	0.307193	57.6333
			rs7610055	-0.481777	0.196682	0.0143044	133.004
			rs7633464	0.339751	0.275147	0.216906	68.8274
			rs76517946	-0.127046	0.239038	0.595081	91.2031
			rs7679276	0.219882	0.362527	0.544165	42.6815
			rs7689420	-0.126461	0.137878	0.359038	274.53
			rs7701233	-0.345201	0.271859	0.204163	70.6587
			rs772222	0.895	0.451988	0.0476879	25.6867
			rs7731023	-0.0920789	0.293482	0.753714	60.6503
			rs7735891	-0.228265	0.185825	0.219302	150.232
			rs77447813	0.22601	0.375609	0.547364	35.8918
			rs7768973	-0.0549246	0.20407	0.787818	125.596
			rs77809369	-0.092043	0.414148	0.824122	30.3892
			rs7816345	0.431349	0.253701	0.0890882	81.9369
			rs7826059	0.351671	0.441087	0.425287	26.8952
			rs7828086	-0.583933	0.417745	0.162167	29.8592
			rs7858712	0.15592	0.250035	0.532896	84.884
			rs7902	-1.17668	0.324641	0.00028944	49.4207
			rs79066296	-0.225821	0.337356	0.50325	45.8843
			rs798548	0.186713	0.145947	0.200784	244.126
			rs8000973	-1.12256	0.359846	0.00181125	40.2459
			rs8017006	-0.157872	0.428462	0.712529	29.5207
			rs8018486	-1.06265	0.446069	0.0172067	26.5421
			rs8019890	-0.241864	0.194888	0.214592	140.193
			rs8020095	-0.175347	0.467533	0.707625	24.1404
			rs80295797	0.575268	0.255412	0.0243026	77.6428
			rs8042578	-0.237598	0.194438	0.221719	136.328
			rs8054549	-0.0551084	0.193839	0.77618	140.373
			rs8084413	-0.494424	0.381957	0.195511	36.1757
			rs839255	-0.886437	0.407805	0.0297293	30.8653
			rs867529	-0.494773	0.290645	0.0886942	61.4159
			rs876122	-0.37053	0.455827	0.416289	25.1722
			rs900399	0.186911	0.300096	0.533391	58.0657
			rs905938	0.290381	0.13823	0.0356673	272.37
			rs909220	-0.322637	0.322425	0.316992	50.0291
			rs9344126	-0.414761	0.261451	0.112653	77.0028
			rs9375188	-2.30891	0.35416	7.05903e-11	41.6016
			rs9385002	-0.736524	0.367001	0.0447632	35.4343
			rs9388490	-0.512201	0.10497	1.06352e-06	473.946
			rs9391254	-1.11808	0.309786	0.000307127	54.0457
			rs947099	0.656782	0.429389	0.126122	28.1765
			rs951366	-0.334598	0.239765	0.162857	90.3086
			rs9517483	-0.74679	0.289743	0.00995405	62.0777
			rs9568031	-0.486749	0.471571	0.301986	24.7199
			rs9590328	-0.574686	0.444854	0.196408	25.6384
			rs9594714	-0.0112766	0.362844	0.975207	39.5988
			rs963317	-0.521211	0.373504	0.162876	37.2216
			rs9647379	-0.316503	0.228187	0.165431	100.795
			rs9828525	-0.0956992	0.403977	0.81274	31.9249
			rs9838614	-0.344861	0.266642	0.195891	73.2004
			rs987666	-0.230312	0.402551	0.567233	32.2657
			rs9890062	-0.417004	0.374393	0.26536	37.0546
			rs9898189	0.228696	0.30684	0.456076	54.8164
			rs990315	1.3714	0.430697	0.00145182	27.9752
			rs9905385	0.0661168	0.151301	0.662119	228.673
			rs9957318	-0.196094	0.270996	0.469308	71.4585
Gastroesophageal reflux disease	Low hand grip strength (EWGSOP)	256523	rs10010963	-0.593025	0.281687	0.0352684	207.506
			rs1011407	0.537305	0.268652	0.0455003	227.883
			rs10133111	-0.1723	0.236913	0.467059	287.253
			rs1021363	0.19861	0.24666	0.420707	270.06
			rs10837002	0.0578681	0.27849	0.835391	210.015
			rs11762636	0.637107	0.184528	0.000555147	472.433
			rs11953061	0.181109	0.27699	0.513211	214.201
			rs12204714	0.697505	0.267203	0.00904392	232.799
			rs12357321	0.920674	0.252239	0.00026224	259.925
			rs12453010	-0.195308	0.252553	0.439325	254.061
			rs12598916	0.210454	0.246532	0.393294	265.831
			rs12967855	0.757968	0.213435	0.000383359	355.855
			rs12997558	0.319932	0.276795	0.247745	214.634
			rs13107325	1.27879	0.196737	8.032e-11	408.863
			rs1334297	0.70106	0.213926	0.00104876	354.211
			rs13409451	0.891436	0.274288	0.00115405	220.689
			rs1431196	-0.181988	0.228256	0.425278	310.35
			rs1479405	0.235038	0.247743	0.342764	260.801
			rs1510719	0.300892	0.195451	0.123689	431.116
			rs1592757	0.813371	0.244333	0.000871749	267.379
			rs1596747	0.247693	0.234826	0.291519	291.277
			rs1716171	0.450543	0.234387	0.0545778	294.919
			rs17379561	0.146972	0.197847	0.457568	419.662
			rs1883842	0.531894	0.265947	0.0455003	230.699
			rs1937450	0.05699	0.234292	0.807817	299.008
			rs2016933	0.0773562	0.267524	0.772462	228.713
			rs2023878	0.234259	0.256307	0.360728	246.629
			rs2043539	-0.216866	0.272001	0.425278	217.186
			rs2106353	-0.108846	0.239462	0.649436	289.663
			rs215614	0.0974003	0.231326	0.673717	303.483
			rs2164300	0.0302171	0.279508	0.91391	210.807
			rs2240326	-0.173846	0.156886	0.267815	669.242
			rs2396133	0.0715388	0.252089	0.776576	259.11
			rs2396766	0.0341554	0.229773	0.881831	311.767
			rs2734839	0.465645	0.264571	0.0784078	231.189
			rs2744961	0.246569	0.263692	0.349755	236.412
			rs2782641	-0.206732	0.280565	0.461218	209.933
			rs2815749	0.0180056	0.24179	0.940638	290.521
			rs2834005	0.0404044	0.265996	0.879267	229.473
			rs2838771	-0.569427	0.274037	0.0377165	217.478
			rs324769	0.354876	0.27643	0.199218	213.766
			rs329122	0.127794	0.255588	0.617075	246.147
			rs3766823	0.0584351	0.246444	0.812569	265.369
			rs3793577	-0.0924867	0.27746	0.738883	218.941
			rs3828917	-0.00596025	0.278642	0.982934	217.62
			rs3863241	0.526183	0.227705	0.0208433	317.456
			rs4300861	0.270242	0.247451	0.274787	268.529
			rs4382592	-0.138761	0.26761	0.604097	232.169
			rs4713692	0.644629	0.275235	0.0191753	213.75
			rs569356	0.432501	0.28218	0.125347	209.755
			rs6711584	0.111612	0.229425	0.626622	310.733
			rs6722661	0.626273	0.238728	0.0087063	290.632
			rs6780459	0.409156	0.278226	0.141403	212.876
			rs7032155	0.645045	0.27027	0.0170019	224.274
			rs7206608	0.511077	0.270974	0.0592847	224.058
			rs7241572	0.25991	0.251702	0.301787	266.398
			rs7527682	-0.15365	0.27732	0.579542	213.422
			rs7541875	0.777452	0.270101	0.00399725	221.295
			rs7600261	0.458534	0.236663	0.0526843	292.808
			rs7612999	0.642137	0.278478	0.0211172	207.962
			rs761777	0.173741	0.246134	0.480261	272.498
			rs7675588	0.34305	0.271457	0.206325	221.103
			rs7685686	-0.361719	0.265022	0.172296	229.331
			rs773109	0.404654	0.204955	0.0483409	389.273
			rs7942368	0.100093	0.264953	0.705596	234.523
			rs903678	0.0432623	0.281205	0.877731	207.976
			rs903959	0.569212	0.257174	0.0268747	245.951
			rs9372625	-0.275665	0.222652	0.215681	405.657
			rs9373363	-0.119326	0.260069	0.646361	243.81
			rs9396740	0.314356	0.269901	0.244138	223.485
			rs942065	0.156156	0.250501	0.533037	264.339
			rs9517313	0.446935	0.229507	0.0514906	312.534
			rs9529055	0.187544	0.277565	0.499247	213.725
			rs9542729	-0.0743404	0.253308	0.769157	256.793
			rs9615905	-0.116086	0.26845	0.665427	227.434
			rs9636202	0.510786	0.236845	0.0310348	289.553
			rs9940128	-0.237585	0.222548	0.285716	325.15
Gastroesophageal reflux disease	Usual walking pace	459915	rs10010963	-0.200734	0.0483286	3.27386e-05	207.506
			rs1011407	-0.203039	0.0461409	1.08042e-05	227.883
			rs10133111	-0.147519	0.0409022	0.000310187	287.253
			rs1021363	-0.0408499	0.0423952	0.335272	270.06
			rs10837002	-0.197962	0.0478612	3.53158e-05	210.015
			rs11762636	-0.0175392	0.0318746	0.582144	472.433
			rs11953061	-0.0751562	0.0476823	0.114983	214.201
			rs12204714	-0.20953	0.0455932	4.31419e-06	232.799
			rs12357321	-0.250192	0.0434186	8.29585e-09	259.925
			rs12453010	-0.163031	0.0438315	0.000199628	254.061
			rs12598916	-0.0857526	0.0426942	0.0445872	265.831
			rs12967855	-0.147442	0.0369697	6.65781e-05	355.855
			rs12997558	-0.198929	0.0475599	2.88067e-05	214.634
			rs13107325	-0.345615	0.034304	7.12208e-24	408.863
			rs1334297	-0.15183	0.0370484	4.16481e-05	354.211
			rs13409451	-0.048554	0.0469033	0.300578	220.689
			rs1431196	-0.0957985	0.0395658	0.0154673	310.35
			rs1479405	-0.0753541	0.0430624	0.080139	260.801
			rs1510719	-0.215162	0.0335646	1.45167e-10	431.116
			rs1592757	-0.0306779	0.0424808	0.470197	267.379
			rs1596747	-0.158717	0.0407117	9.67688e-05	291.277
			rs1716171	-0.0666937	0.0403994	0.0987676	294.919
			rs17379561	-0.142083	0.034063	3.03029e-05	419.662
			rs1883842	-0.145684	0.0459683	0.00152843	230.699
			rs1937450	-0.102414	0.0404958	0.0114389	299.008
			rs2016933	-0.0964323	0.0457788	0.0351623	228.713
			rs2023878	-0.131575	0.0444147	0.00305223	246.629
			rs2043539	-0.143168	0.0471109	0.00237405	217.186
			rs2106353	-0.0822807	0.0410693	0.0451281	289.663
			rs215614	-0.00339209	0.0398894	0.932232	303.483
			rs2164300	-0.181289	0.0480127	0.00015946	210.807
			rs2240326	-0.197515	0.0268332	1.8275e-13	669.242
			rs2396133	-0.0294205	0.0432466	0.496317	259.11
			rs2396766	-0.0110817	0.0393759	0.778378	311.767
			rs2734839	-0.209522	0.0457556	4.66866e-06	231.189
			rs2744961	-0.266206	0.0451698	3.78235e-09	236.412
			rs2782641	-0.0301192	0.0481715	0.531808	209.933
			rs2815749	-0.0571381	0.0409302	0.162718	290.521
			rs2834005	-0.115119	0.0458843	0.0121106	229.473
			rs2838771	-0.148415	0.0472223	0.00167287	217.478
			rs324769	-0.263081	0.0475698	3.19491e-08	213.766
			rs329122	-0.0464896	0.0443465	0.294488	246.147
			rs3766823	-0.291977	0.042635	7.47329e-12	265.369
			rs3793577	-0.00826935	0.0474424	0.861627	218.941
			rs3828917	-0.093104	0.0471536	0.0483269	217.62
			rs3863241	-0.0800044	0.0390071	0.0402647	317.456
			rs4300861	-0.102441	0.0425006	0.0159376	268.529
			rs4382592	-0.175893	0.0456431	0.000116368	232.169
			rs4713692	-0.180493	0.0475472	0.000146998	213.75
			rs569356	-0.0446457	0.0481334	0.353646	209.755
			rs6711584	0.00721843	0.0396016	0.855366	310.733
			rs6722661	-0.2109	0.0408817	2.48563e-07	290.632
			rs6780459	-0.107082	0.0476663	0.0246721	212.876
			rs7032155	-0.140181	0.0466724	0.00266896	224.274
			rs7206608	-0.172076	0.0465197	0.000216464	224.058
			rs7241572	-0.143466	0.0432707	0.000914611	266.398
			rs7527682	-0.107186	0.0475641	0.0242268	213.422
			rs7541875	-0.0703966	0.0466442	0.131241	221.295
			rs7600261	-0.0953247	0.0406716	0.0190903	292.808
			rs7612999	-0.165609	0.0482549	0.00059922	207.962
			rs761777	-0.0760825	0.0420405	0.0703356	272.498
			rs7675588	-0.193454	0.0466766	3.40464e-05	221.103
			rs7685686	-0.130571	0.0459119	0.0044557	229.331
			rs773109	-0.0592445	0.0352858	0.0931543	389.273
			rs7942368	-0.209684	0.0457491	4.57582e-06	234.523
			rs903678	-0.259837	0.048219	7.09758e-08	207.976
			rs903959	0.0617232	0.0444394	0.164854	245.951
			rs9372625	-0.156509	0.034624	6.17693e-06	405.657
			rs9373363	-0.183042	0.0449081	4.58317e-05	243.81
			rs9396740	-0.0645353	0.0463655	0.163959	223.485
			rs942065	-0.111386	0.0428838	0.00939347	264.339
			rs9517313	-0.0578214	0.0393234	0.141452	312.534
			rs9529055	-0.191175	0.0475458	5.79884e-05	213.725
			rs9542729	-0.0871922	0.0435037	0.0450436	256.793
			rs9615905	-0.14228	0.0460997	0.00202625	227.434
			rs9636202	-0.108123	0.0409965	0.00835494	289.553
			rs9940128	-0.290341	0.0385239	4.82263e-14	325.15
Gastroesophageal reflux disease	Appendicular lean mass	450243	rs10010963	-0.18532	0.0704218	0.00849891	207.506
			rs1011407	-0.0713236	0.0689462	0.300911	227.883
			rs10133111	-0.0335028	0.0622196	0.590258	287.253
			rs1021363	-0.224237	0.0640677	0.000465258	270.06
			rs10837002	0.0578681	0.0723351	0.423711	210.015
			rs11762636	-0.0466176	0.0466176	0.317311	472.433
			rs11953061	-0.0781253	0.071023	0.271332	214.201
			rs12204714	-0.294965	0.0694035	2.13771e-05	232.799
			rs12357321	-0.132426	0.0662128	0.0455003	259.925
			rs12453010	-0.114491	0.0639802	0.0735386	254.061
			rs12598916	-0.0481038	0.0631362	0.446117	265.831
			rs12967855	-0.410452	0.0547269	6.38178e-14	355.855
			rs12997558	-0.506859	0.0718949	1.78918e-12	214.634
			rs13107325	-0.14684	0.0513228	0.00422159	408.863
			rs1334297	-0.195884	0.0567034	0.000551221	354.211
			rs13409451	0.0793992	0.068572	0.246907	220.689
			rs1431196	0.114128	0.0586063	0.0514906	310.35
			rs1479405	-0.282681	0.0635237	8.58703e-06	260.801
			rs1510719	-0.277746	0.0488628	1.31418e-08	431.116
			rs1592757	-0.154316	0.0642981	0.0163951	267.379
			rs1596747	-0.0965037	0.061119	0.114348	291.277
			rs1716171	-0.695347	0.0598988	3.72251e-31	294.919
			rs17379561	-0.0791387	0.0508749	0.119814	419.662
			rs1883842	-0.00324326	0.0681084	0.96202	230.699
			rs1937450	0.0443255	0.0601561	0.461218	299.008
			rs2016933	0.0838026	0.0676867	0.215681	228.713
			rs2023878	0.0358279	0.0661438	0.588048	246.629
			rs2043539	-0.0808651	0.069838	0.246907	217.186
			rs2106353	-0.160548	0.0598654	0.00732232	289.663
			rs215614	-0.0426126	0.0608752	0.483927	303.483
			rs2164300	-0.0415485	0.0717655	0.562625	210.807
			rs2240326	0.0954035	0.0402815	0.0178642	669.242
			rs2396133	-0.0136264	0.0647256	0.833257	259.11
			rs2396766	-0.0372605	0.0589958	0.527662	311.767
			rs2734839	-0.246933	0.0670246	0.000229413	231.189
			rs2744961	0.386977	0.0684915	1.60448e-08	236.412
			rs2782641	-0.417156	0.0701412	2.72488e-09	209.933
			rs2815749	-0.0128612	0.0617336	0.834969	290.521
			rs2834005	0.0707078	0.0707078	0.317311	229.473
			rs2838771	-0.0142357	0.0711784	0.841481	217.478
			rs324769	-0.0784463	0.0709752	0.269046	213.766
			rs329122	0.110524	0.0656238	0.092141	246.147
			rs3766823	-0.0990856	0.0635164	0.11876	265.369
			rs3793577	0.0665905	0.0702899	0.343451	218.941
			rs3828917	-0.298012	0.0700329	2.08751e-05	217.62
			rs3863241	0.0153855	0.0584648	0.792429	317.456
			rs4300861	0.0748864	0.0618627	0.226077	268.529
			rs4382592	-0.15528	0.0693804	0.0252148	232.169
			rs4713692	-0.322314	0.0724302	8.58703e-06	213.75
			rs569356	-0.316464	0.0712044	8.81193e-06	209.755
			rs6711584	0.0155017	0.0589065	0.792429	310.733
			rs6722661	-0.105412	0.0620072	0.0891309	290.632
			rs6780459	-0.00981974	0.0720114	0.891534	212.876
			rs7032155	-0.111712	0.0684685	0.102768	224.274
			rs7206608	-0.174933	0.068601	0.0107723	224.058
			rs7241572	-0.207928	0.0656615	0.00154197	266.398
			rs7527682	-0.131165	0.0712037	0.0654598	213.422
			rs7541875	0.0438001	0.0693502	0.527662	221.295
			rs7600261	-0.124248	0.0591656	0.0357288	292.808
			rs7612999	-0.134324	0.0720766	0.0623728	207.962
			rs761777	-0.0810793	0.0637051	0.203115	272.498
			rs7675588	-0.176	0.06861	0.0103111	221.103
			rs7685686	-0.189813	0.0680462	0.00527938	229.331
			rs773109	0.325825	0.0525525	5.64632e-10	389.273
			rs7942368	-0.206074	0.0677102	0.0023386	234.523
			rs903678	0.295625	0.0721038	4.1315e-05	207.976
			rs903959	0.0891538	0.0651508	0.17118	245.951
			rs9372625	-0.275665	0.0503618	4.40774e-08	405.657
			rs9373363	-0.25089	0.067312	0.000193563	243.81
			rs9396740	-0.0984346	0.0698568	0.158808	223.485
			rs942065	0.104104	0.0650652	0.109599	264.339
			rs9517313	-0.217428	0.0603967	0.000318217	312.534
			rs9529055	-0.191295	0.0712667	0.00727013	213.725
			rs9542729	-0.0137667	0.0660804	0.834969	256.793
			rs9615905	-0.174129	0.0689262	0.0115266	227.434
			rs9636202	-0.0313891	0.0627782	0.617075	289.553
			rs9940128	0.655613	0.0571406	1.78878e-30	325.15
SE, standard error;
